# Supplementary material for: Serotonin 2B Receptor Antagonism Prevents Heritable Pulmonary Arterial Hypertension
Source: PubMed Central journal article supplement (PMC4749293; doi:10.1371/journal.pone.0148657), 2016-02-10
Supplement: pone.0148657.s002.pdf [file pone.0148657.s002.pdf]

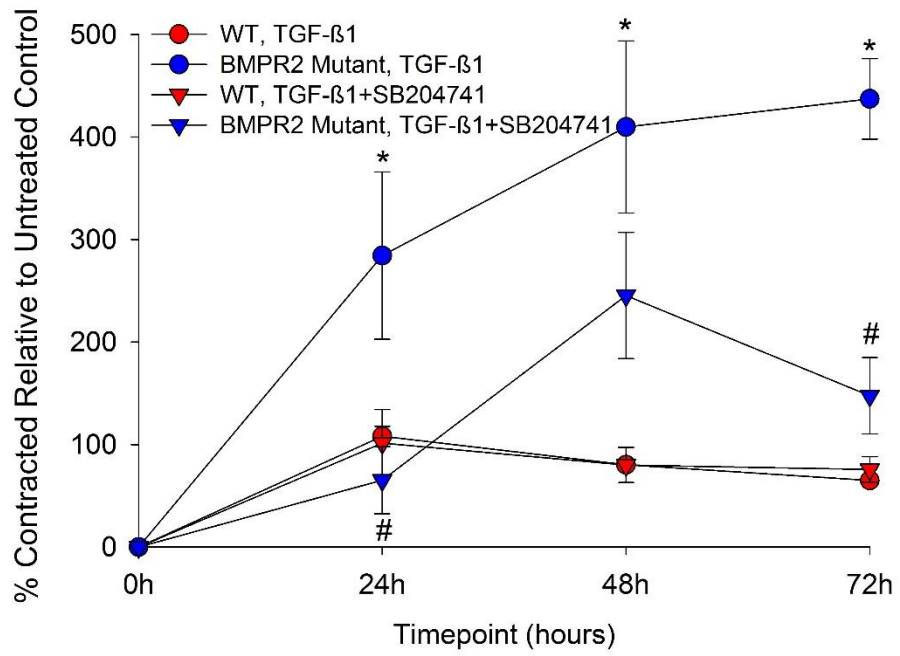

Supplemental Figure 2: Gel contraction time course data
